# Supplementary material for: Up-regulation of PUM1 by miR-218-5p promotes colorectal tumor-initiating cell properties and tumorigenesis by regulating the PI3K/AKT axis
Source: PubMed Central journal article supplement — J Gastrointest Oncol. 2023 Feb 28;14(1):233–44. doi: 10.21037/jgo-23-6 (PMC10007912; doi:10.21037/jgo-23-6), 2023-02-28
Supplement: jgo-14-01-233-supplementary.pdf [file jgo-14-01-233-supplementary.pdf]

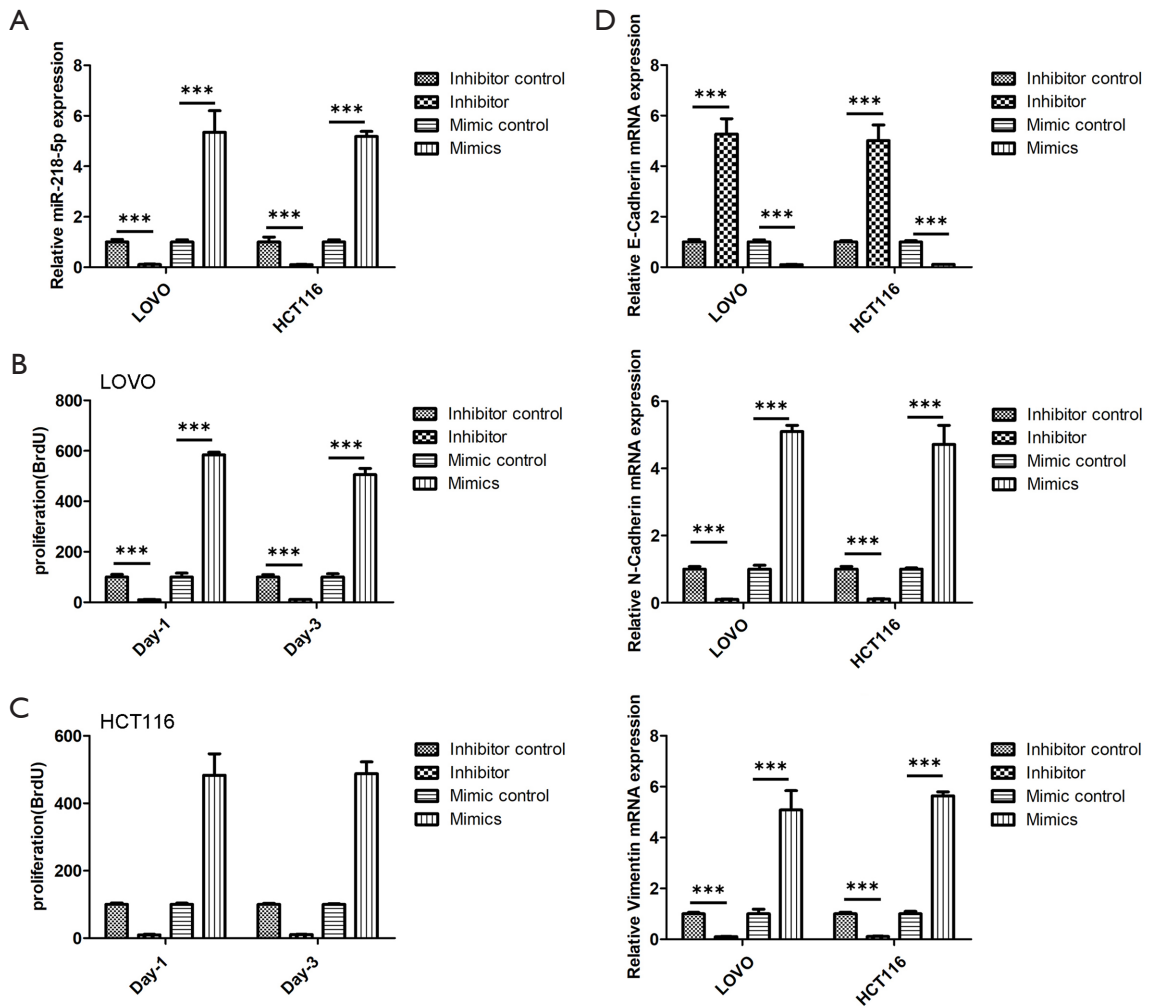

**Figure S1** miR-218-5p inhibited CRC cell proliferation, migration, and invasion. (A) Transfected miR-218-5p mimics or inhibitors and the miRNA level were quantified via qRT-PCR. (B,C) miR-218-5p effect on CRC cell proliferation was assessed based on BrdU. (D) miR-218-5p affected E-cadherin, N-cadherin, and vimentin in CRC cells. All results are presented as the mean  $\pm$  SD, and statistical significance was assessed using a two-tailed Student t-test. \*\*\* $P < 0.001$ . BrdU, bromodeoxyuridine; mRNA, messenger RNA; CRC, colorectal cancer; miRNA, microRNA; qRT-PCR, quantitative reverse transcription polymerase chain reaction; SD, standard deviation.

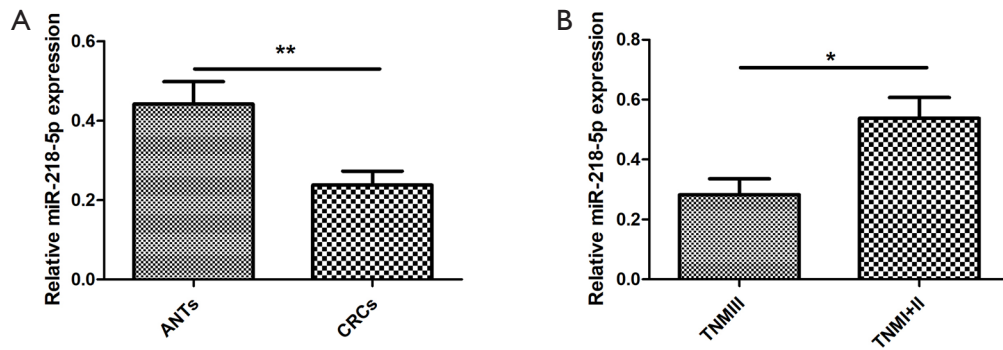

**Figure S2** Decreased miR-218-5p expression in CRC. (A) The expression of miR-218-5p was assessed by qRT-PCR in 16 pairs of CRC tumors and para-cancerous normal tissue. (B) miR-218-5p expression levels were higher in patients with more advanced CRC. All results are presented as the mean  $\pm$  SD, and statistical significance was assessed using a two-tailed Student t-test. \* $P < 0.05$ ; \*\* $P < 0.01$ . ANTs, adjacent normal tissues; CRC, colorectal cancer; TNM, tumor node metastasis classification; qRT-PCR, quantitative reverse transcription polymerase chain reaction; SD, standard deviation.
